# Supplementary material for: Activated nanolithia as an effective prelithiation additive for lithium-ion batteries
Source: Royal Society of Chemistry journal article supplement (doi:10.1039/d3ta00773a), 2023-01-01
Supplement: d3ta00773a1.pdf [file d3ta00773a1.pdf]

**Supplementary information**

**Activated Nanolithia as an Effective Prelithiation Additive for Lithium-Ion Batteries**

*Jingxi Zhang,<sup>a</sup> Xi Chen,<sup>a</sup> Gang Shao,<sup>b</sup> Hailong Wang,<sup>b</sup> Yanhao Dong<sup>\*a</sup> and Chang-An Wang<sup>\*a</sup>*

*<sup>a</sup>State Key Laboratory of New Ceramics and Fine Processing, School of Materials Science and Engineering, Tsinghua University, Beijing 100084, China*

*<sup>b</sup>School of Materials Science and Engineering, Zhengzhou University, Zhengzhou 450001, Henan, China*

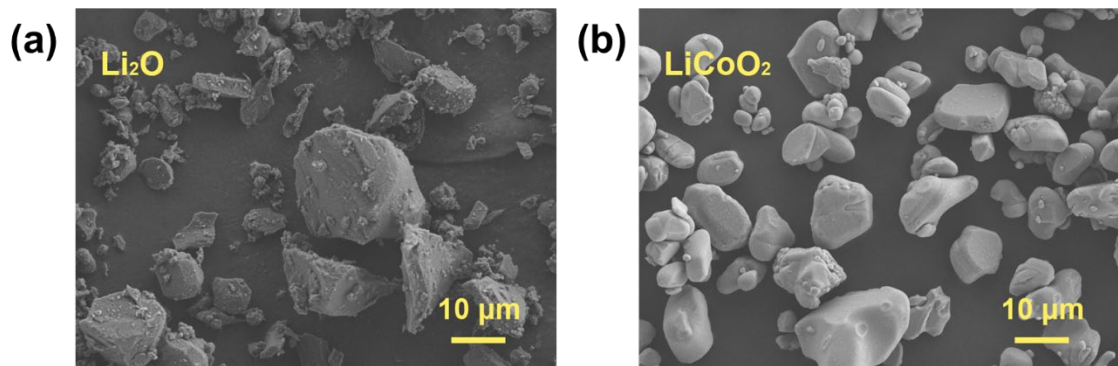

**Figure. 1** SEM images of commercial  $\text{Li}_2\text{O}$  powder (a) and commercial  $\text{LiCoO}_2$  powder (b).

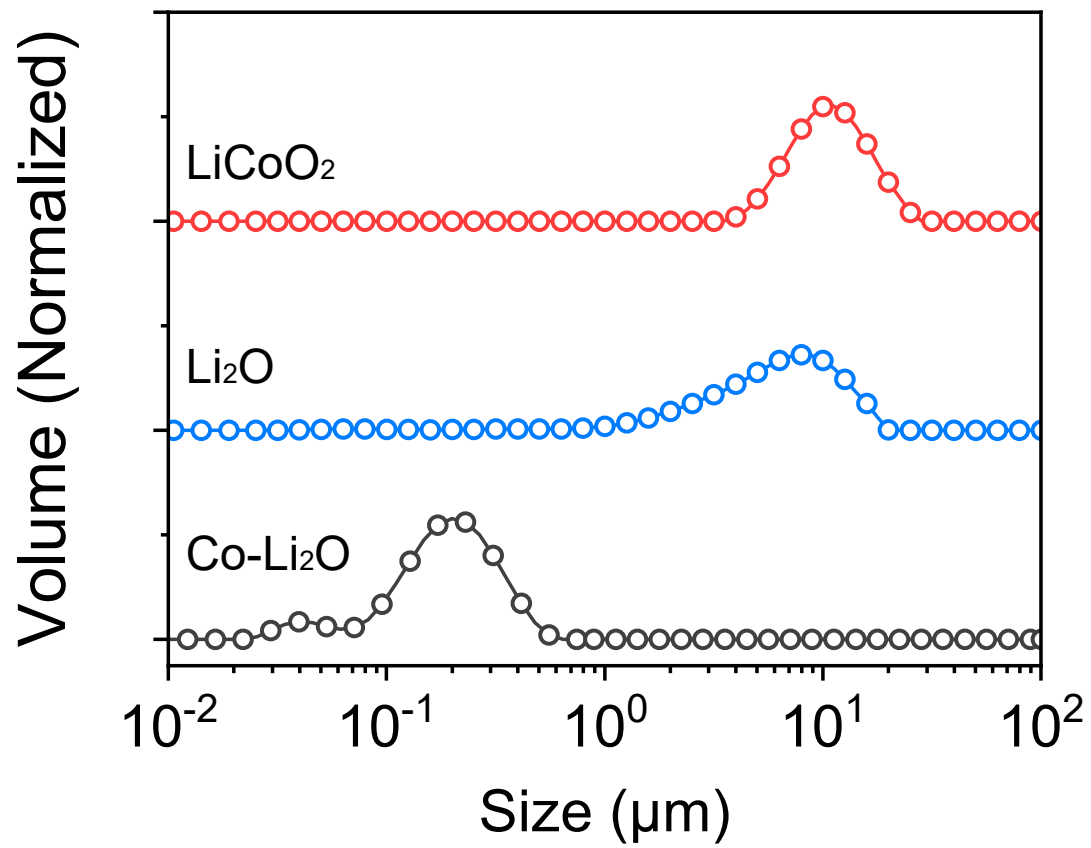

**Figure. 2** Particle size distribution of LiCoO<sub>2</sub>, Li<sub>2</sub>O and Co-Li<sub>2</sub>O.

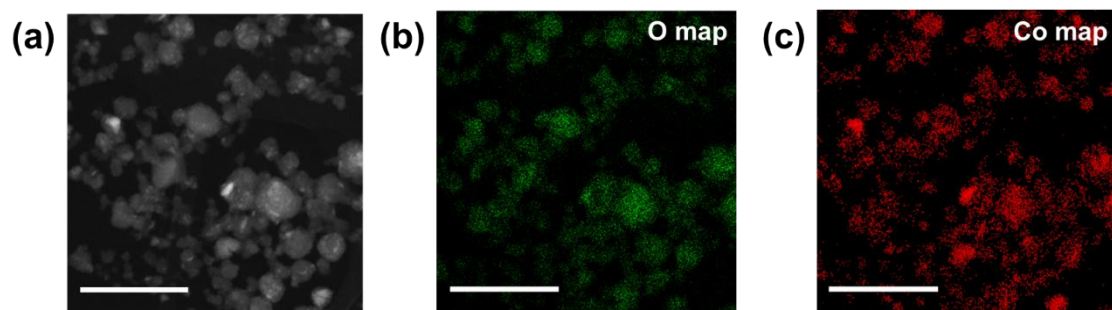

**Figure. 3** (a) TEM image of Co-Li<sub>2</sub>O. (b, c) EDS mapping of Co-Li<sub>2</sub>O. Scale bar: 1  $\mu$ m.

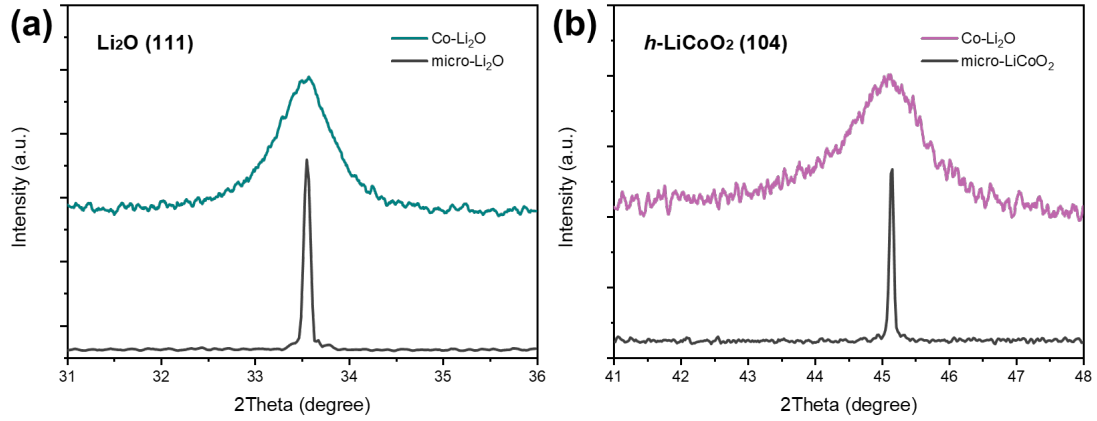

**Figure. 4** XRD peaks broadening of Co-Li<sub>2</sub>O.

The crystallite sizes can be calculated by Sherrer's equation:

$$D_{hkl} = \frac{0.89\lambda}{\beta_{hkl} \cos\theta}$$

Where  $D_{hkl}$  is the thickness of the primary particle in  $[hkl]$  direction (representing the diameter of the primary particle),  $\lambda$  is the wavelength of the incident X-ray,  $\beta_{hkl}$  is the full width at half maximum (FWHM) and  $\theta$  is the diffraction angle of  $(hkl)$ . The results are listed in Supplementary Table 1.

**Table. 1** Stimulated peaks information and calculated crystallite sizes.

| Peak                     | Instrumental FWHM (°) | FWHM (°) | 2Theta (°) | Crystallite size (nm) |
|--------------------------|-----------------------|----------|------------|-----------------------|
| Li <sub>2</sub> O (111)  | 0.06309               | 0.78331  | 33.52049   | 11                    |
| LiCoO <sub>2</sub> (104) | 0.06988               | 1.53069  | 45.0571    | 6                     |

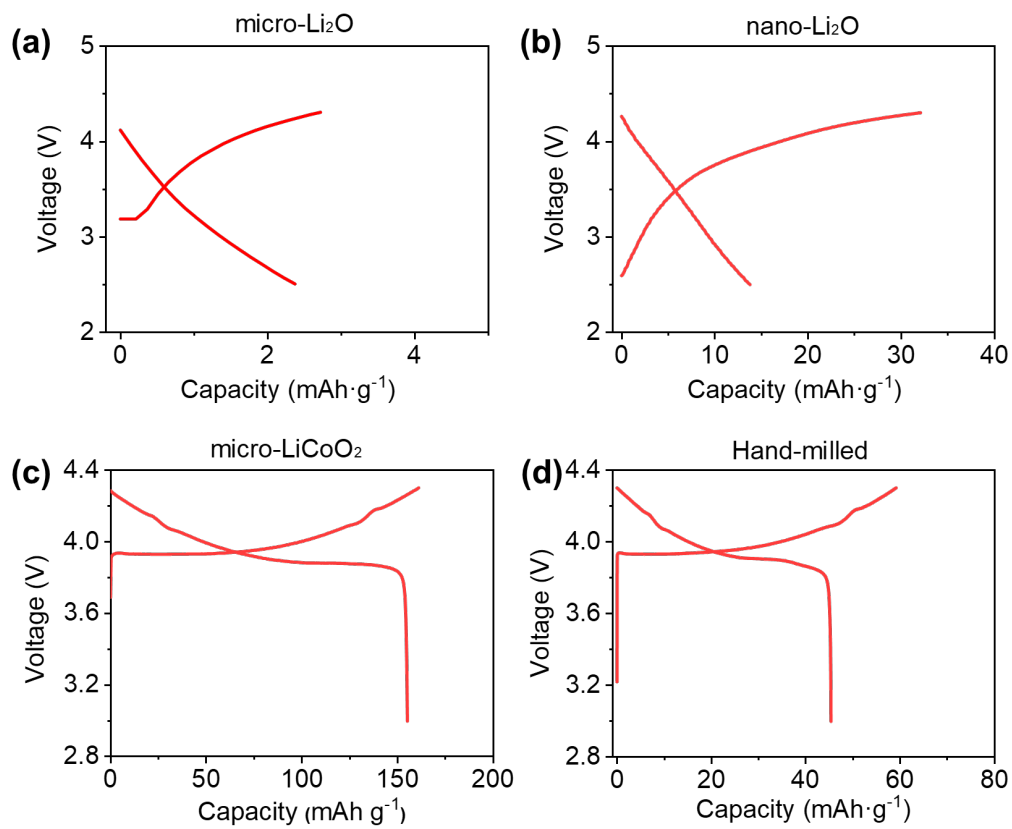

**Figure. 5** Initial charge-discharge voltage profile of (a) micro- $\text{Li}_2\text{O}$ , (b) nano- $\text{Li}_2\text{O}$ , (c) micro- $\text{LiCoO}_2$  and (d) Hand-milled  $\text{Li}_2\text{O}$ - $\text{LiCoO}_2$  composite.

**Table. 2** Calculation of extracted Li ratio in Li<sub>2</sub>O.

| $x$ (Li <sub>2</sub> O)      | Theoretical irreversible capacity (mAh g <sup>-1</sup> ) | Experimental irreversible capacity (mAh g <sup>-1</sup> ) | Extracted Li ratio (%) |
|------------------------------|----------------------------------------------------------|-----------------------------------------------------------|------------------------|
| 1 (pure Li <sub>2</sub> O)   | 1793.9                                                   | 18.9                                                      | 1                      |
| 0.9                          | 1614.5                                                   | 806.5                                                     | 50                     |
| 0.8                          | 1435.1                                                   | 1001.5                                                    | 70                     |
| 0.7                          | 1255.7                                                   | 1211.9                                                    | 97                     |
| 0.6                          | 1076.3                                                   | 1110.1                                                    | 103                    |
| 0.5                          | 897.0                                                    | 937.5                                                     | 105                    |
| 0.4                          | 717.6                                                    | 701.7                                                     | 98                     |
| 0 (pure LiCoO <sub>2</sub> ) | 0                                                        | 5.9                                                       | -                      |

The capacity from LiCoO<sub>2</sub> is assumed to be fully reversible, while the capacity from Li<sub>2</sub>O is assumed to be fully irreversible. Thus the extracted Li ratio in Li<sub>2</sub>O is calculated by

$$\text{Extracted Li ratio} = \frac{\text{Experimental irreversible capacity}}{\text{Theoretical irreversible capacity}}$$

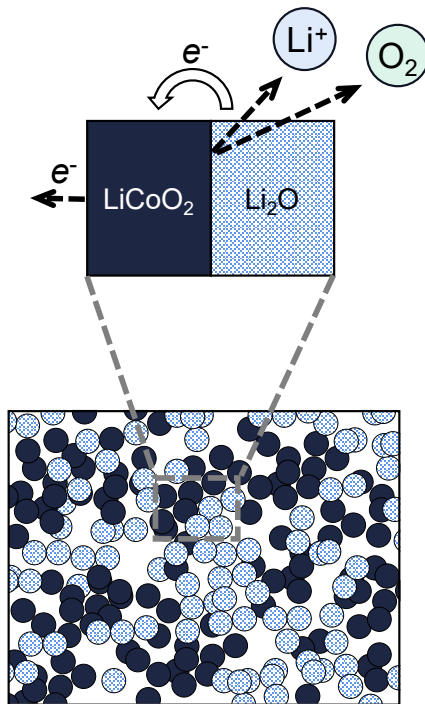

**Figure. 6** Schematic diagram of the origin of facile  $\text{Li}_2\text{O}$  decomposition kinetic.



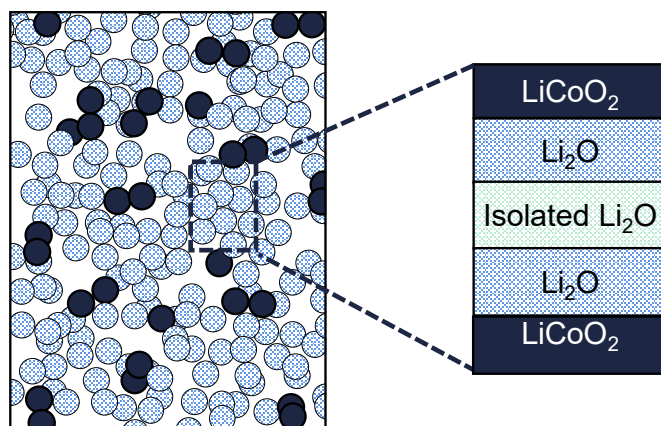

**Figure. 7** Schematic diagram of the origin of low extracted Li ratio when  $x(\text{Li}_2\text{O}) > 0.7$ .

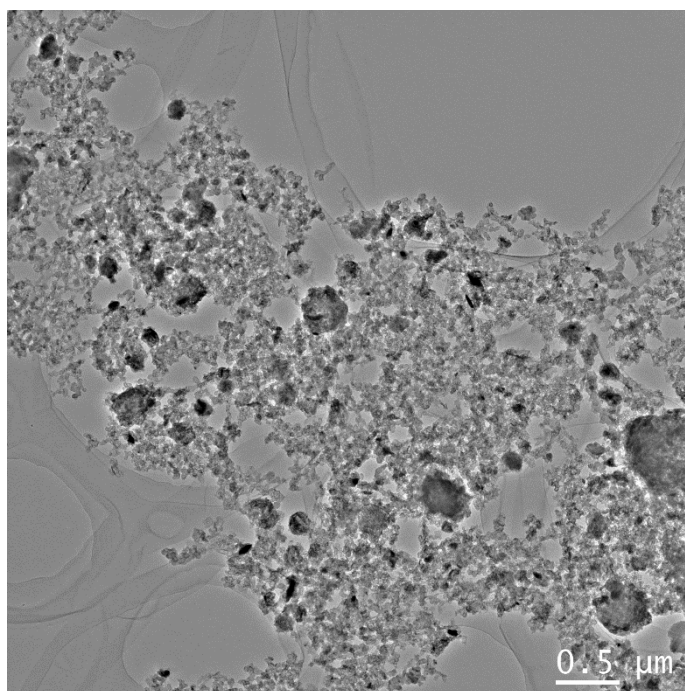

**Figure. 8** TEM image of charged Co-Li<sub>2</sub>O. The dark dots are remained Li<sub>1-x</sub>CoO<sub>2</sub> species, the particles around dark dots are conductive carbon black.

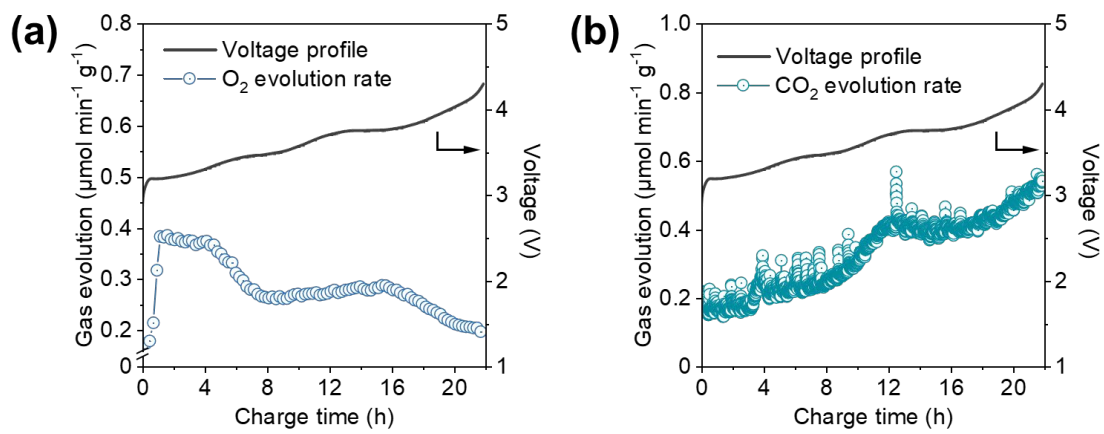

**Figure. 9** Gas evolution rate and correspondent voltage profile of the Co-Li<sub>2</sub>O electrode during charging. (a) O<sub>2</sub> and (b) CO<sub>2</sub>.

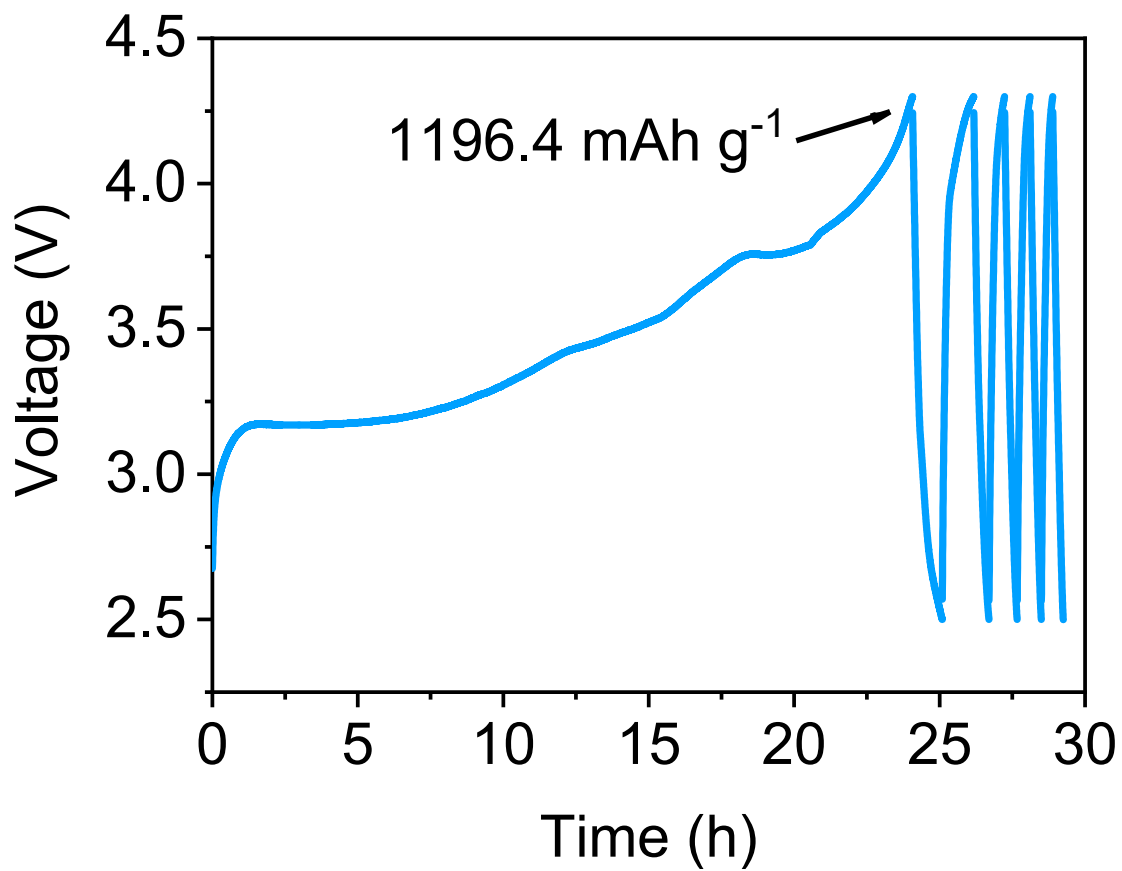

**Figure. 10** Initial galvanostatic charge-discharge profiles of Co-Li<sub>2</sub>O using Li<sub>2</sub>O and wasted LiCoO<sub>2</sub> as raw materials.

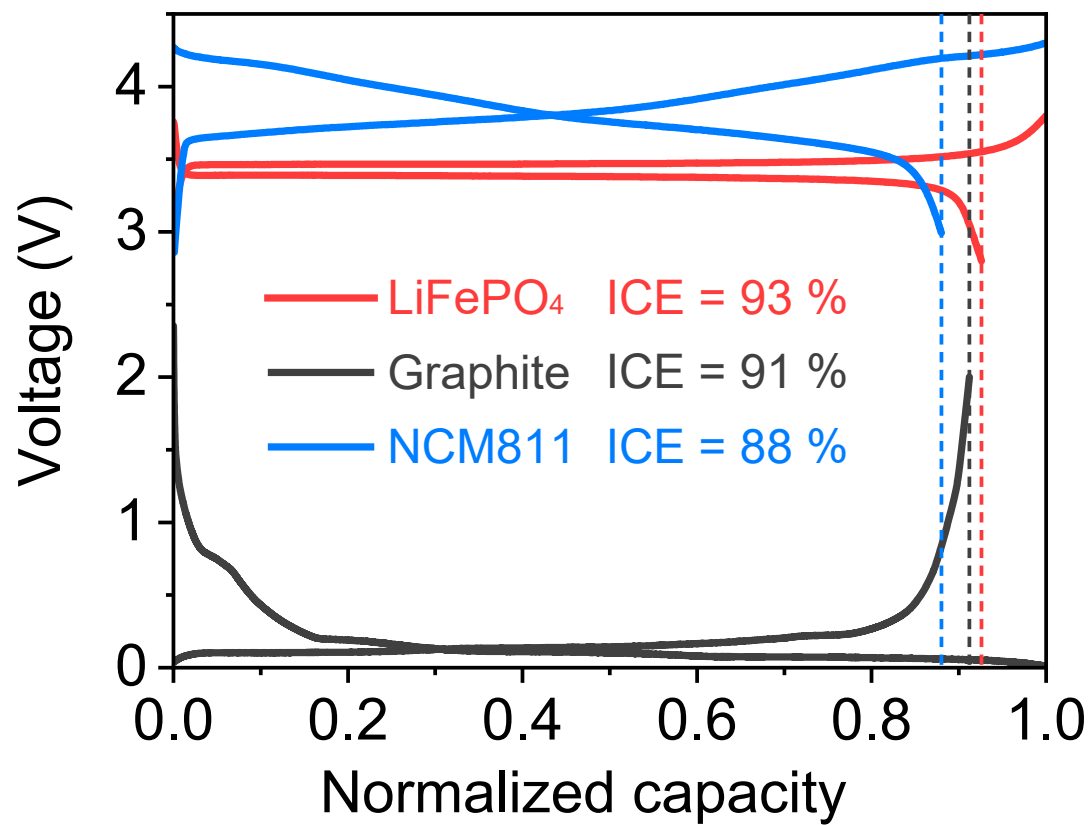

**Figure. 11** ICE comparison of LiFePO<sub>4</sub>, graphite and NCM811.

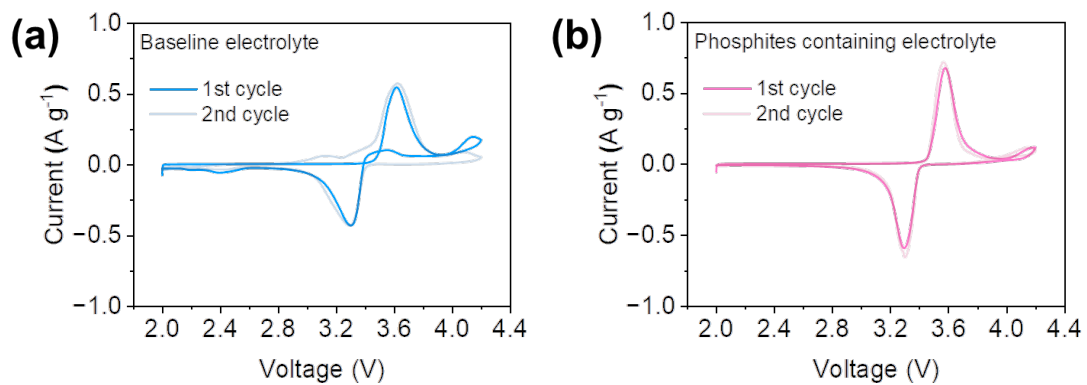

**Figure. 12** (a) CV curves of LiFePO<sub>4</sub> electrode with 3.5% Co-Li<sub>2</sub>O in baseline electrolyte. (b) CV curves of LiFePO<sub>4</sub> electrode with 3.5% Co-Li<sub>2</sub>O in phosphites-containing electrolyte. The scanning rate is 0.2 mV·s<sup>-1</sup>.

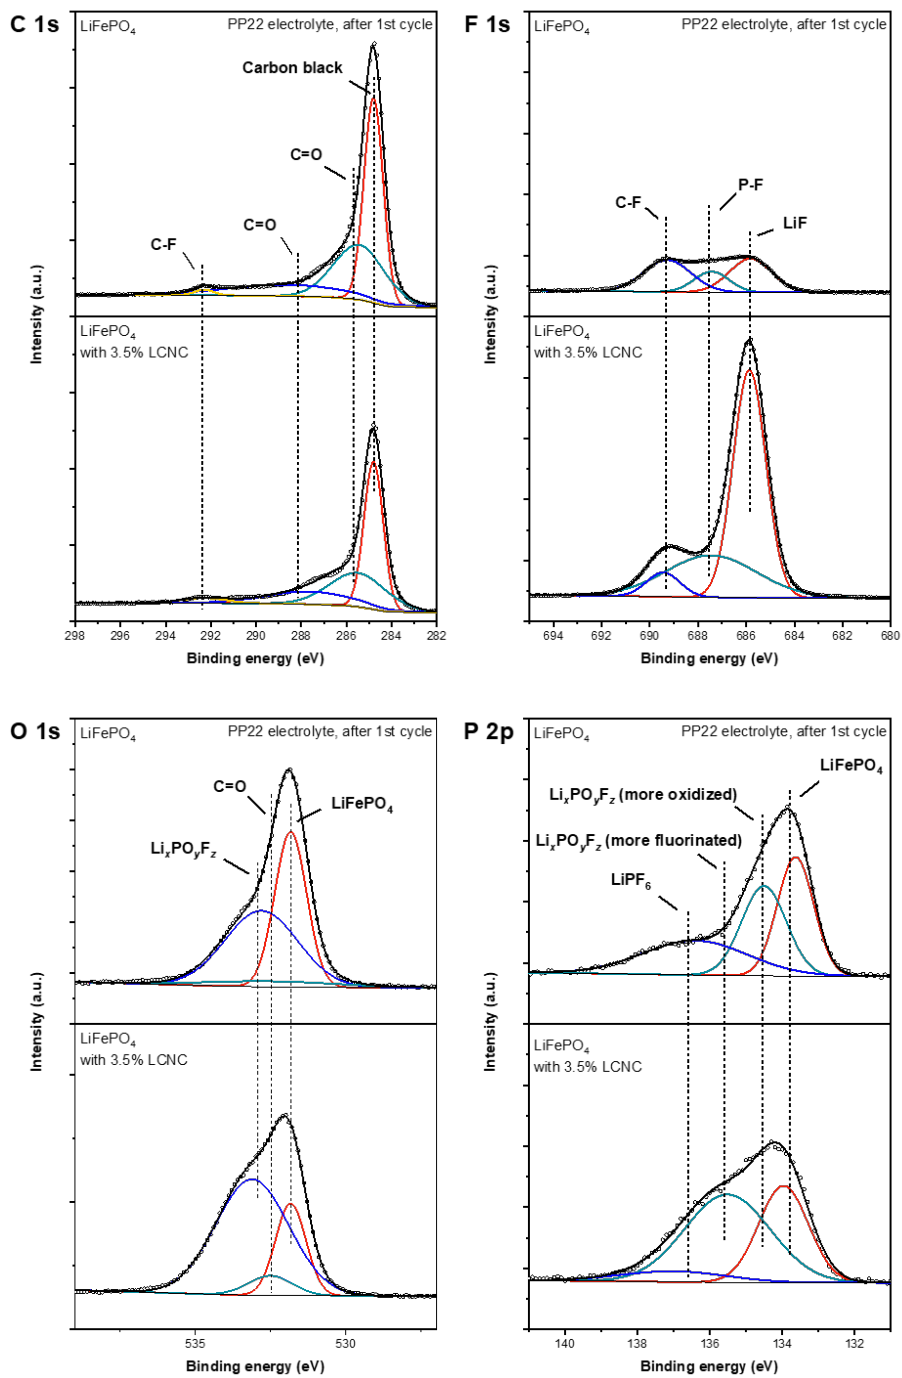

**Figure .13** XPS of charged LiFePO<sub>4</sub> electrode with 3.5% Co-Li<sub>2</sub>O and without additive in phosphites-containing electrolyte. Here the phosphites-containing electrolyte was abbreviated to PP22 for convenience.

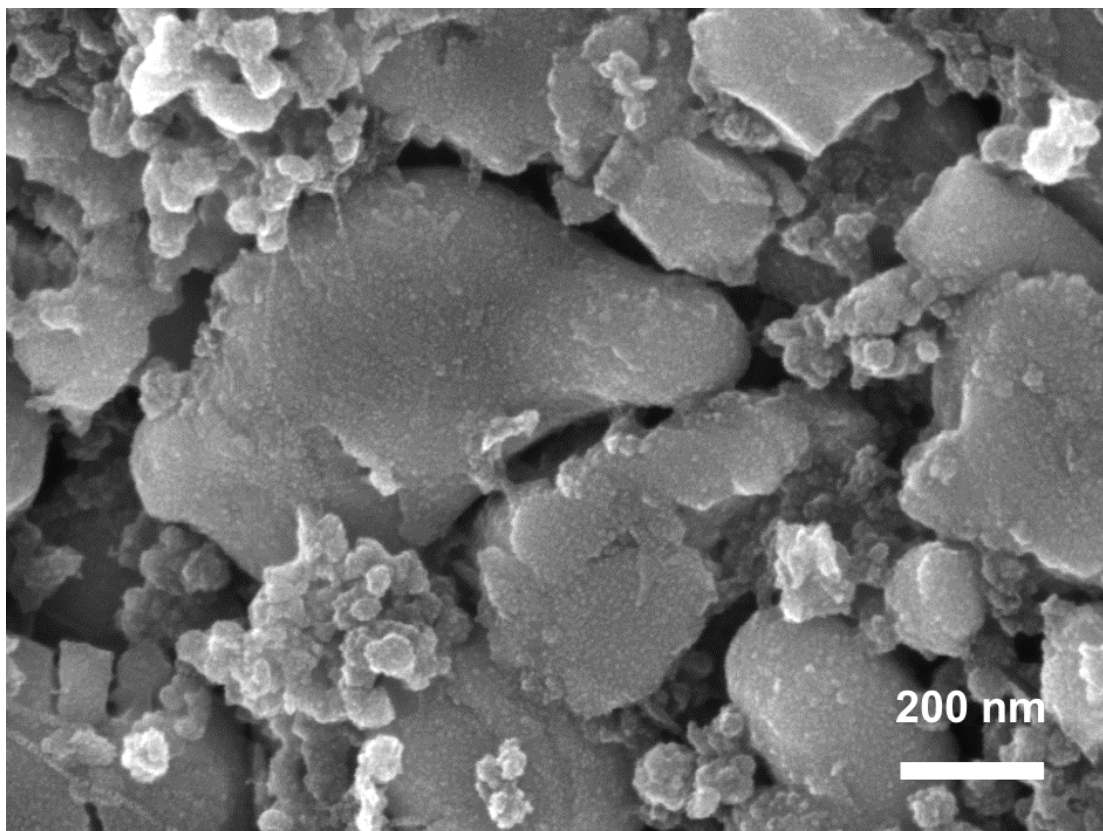

**Figure. 14** Cross-sectional SEM image of charged  $\text{LiFePO}_4$  electrode with 3.5%  $\text{Co-Li}_2\text{O}$ .



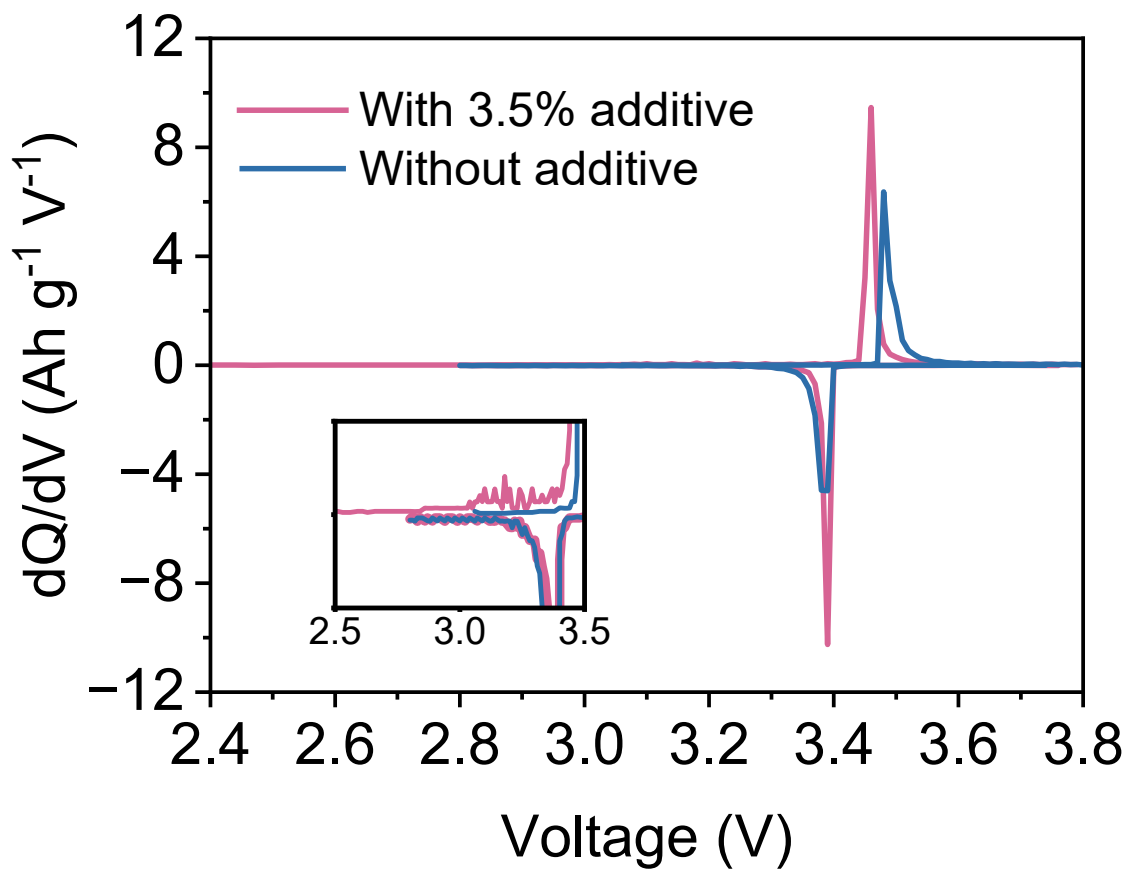

**Figure. 15** First cycle  $dQ/dV$  plots of Li || LiFePO<sub>4</sub> full cells with and without 3.5% Co-Li<sub>2</sub>O.

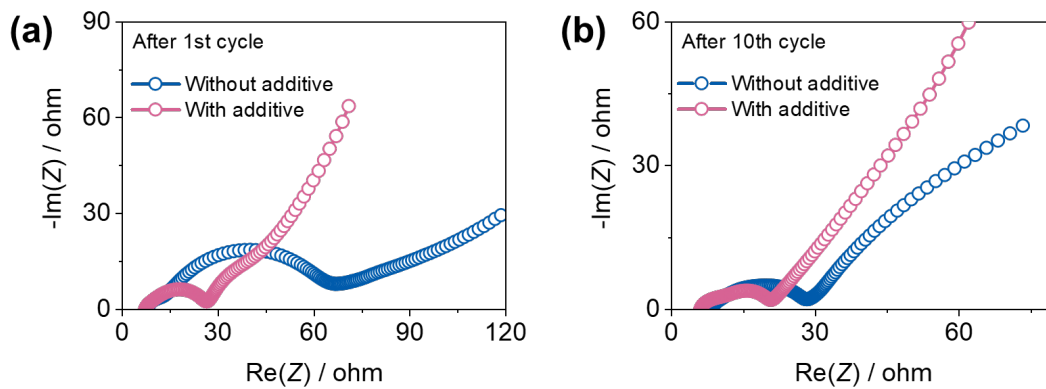

**Figure. 16** Electrochemical impedance spectra with and without additive. (a) After the first cycle. (b) After 10 cycle.

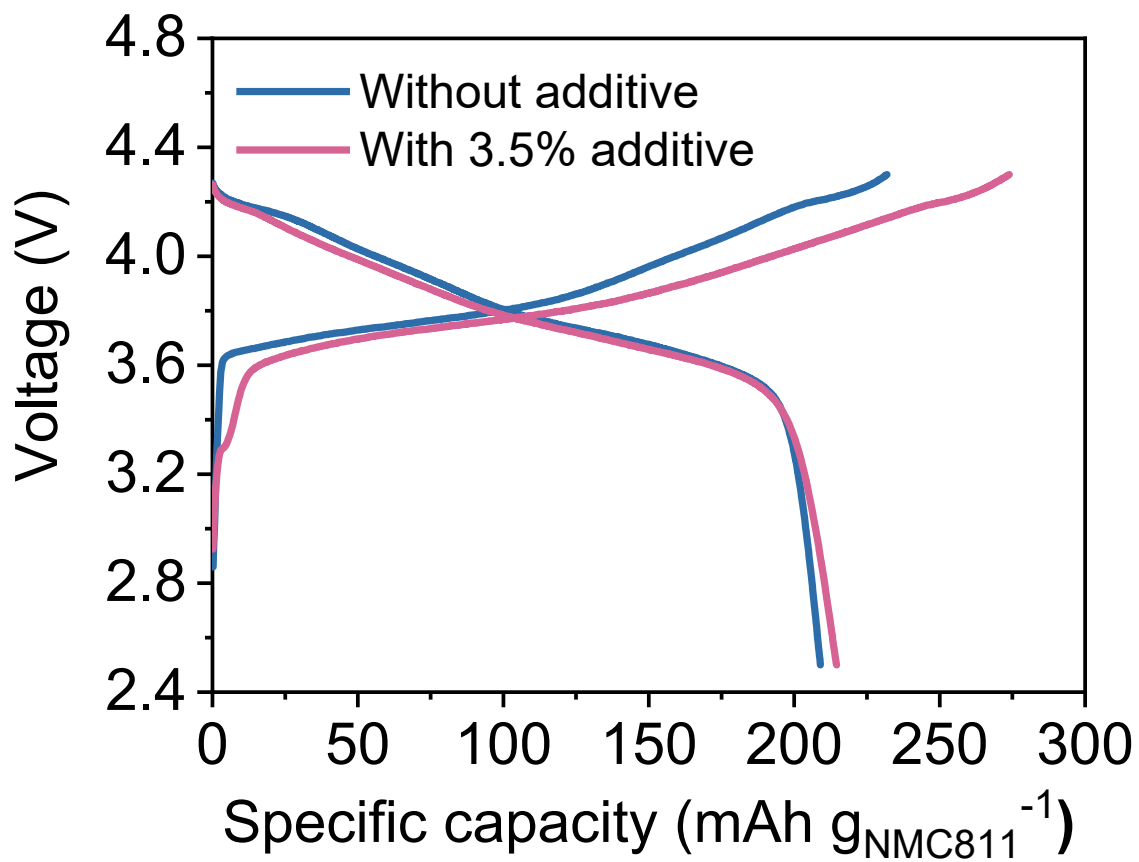

**Figure. 17** Voltage profiles of  $\text{LiNi}_{0.8}\text{Co}_{0.1}\text{Mn}_{0.1}\text{O}_2$  half cells with and without 3.5%  $\text{Co-Li}_2\text{O}$ .

The current density is  $50 \text{ mA} \cdot \text{g}_{\text{NMC811}}^{-1}$ .

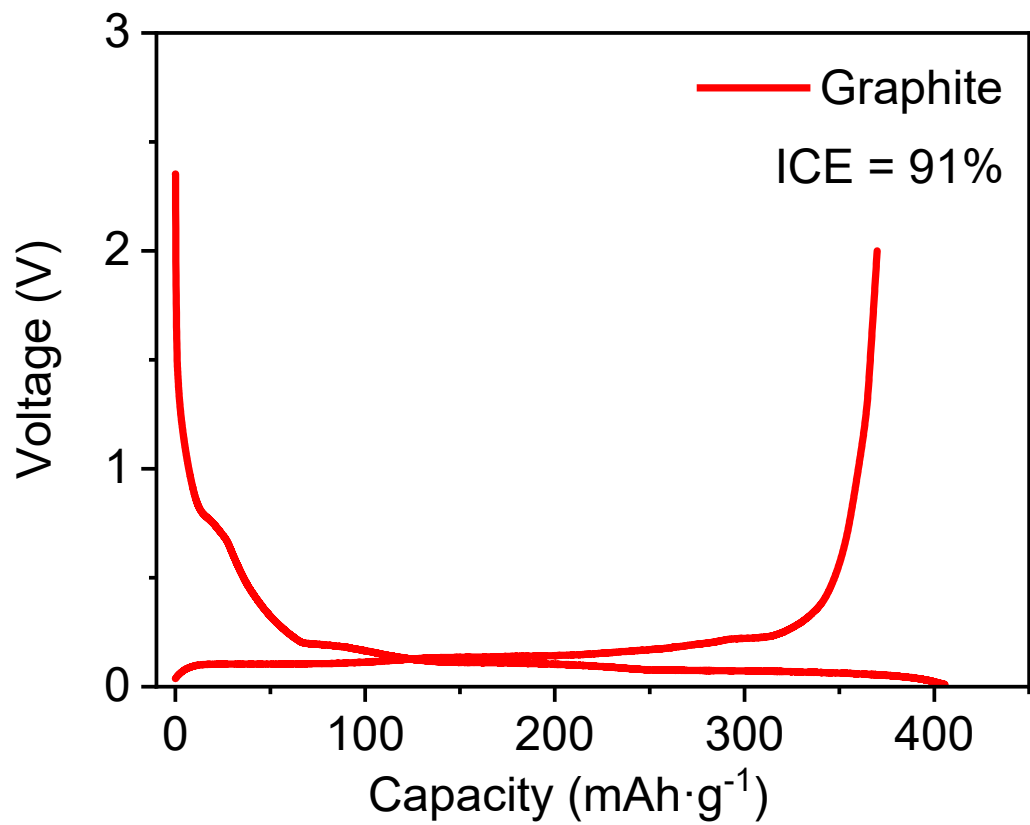

**Figure. 18** Initial charge-discharge profile of graphite.

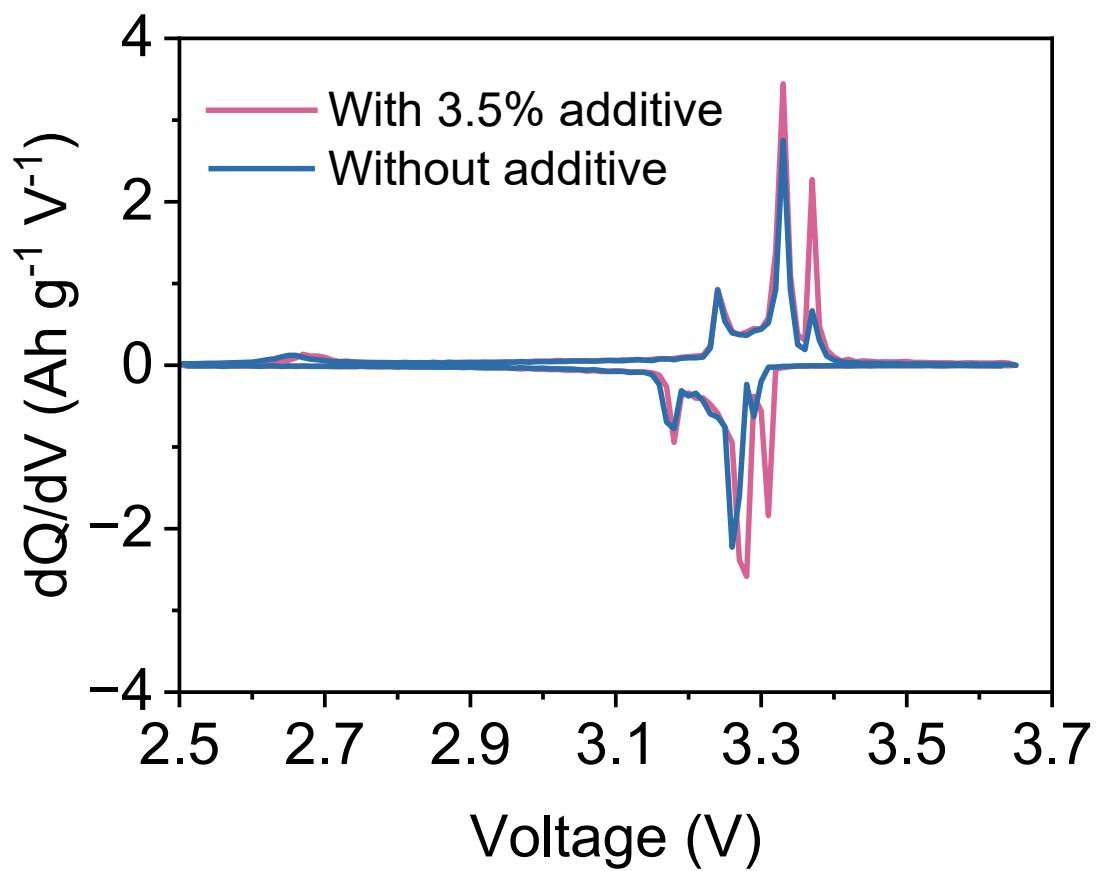

**Figure. 19** First cycle  $dQ/dV$  plots of graphite || LiFePO<sub>4</sub> full cells with and without 3.5% Co-Li<sub>2</sub>O.
